# Supplementary material
Source: PubMed Central journal article supplement (PMC3079219)

## **Supplementary Figure Legends**

**Supplementary Figure 1.** Correlation between changes in LDL-C (%) for ezetimibe, simvastatin, and ezetimibe plus simvastatin and percent changes in plasma campesterol:lathosterol ratio (%) (left), baseline levels of PCSK9 (middle) and percent change in PCSK9 levels (right). To account for the skewed distribution of both plant sterols and PCSK9, Spearman correlations were constructed to determine the relationship between LDL-C response and baseline plasma levels of noncholesterol sterols and PCSK9.

**Supplementary Figure 2.** Correlation between changes in LDL-C levels on ezetimibe alone and simvastatin alone versus ezetimibe + simvastatin therapy.

# Suppl. Figure 1

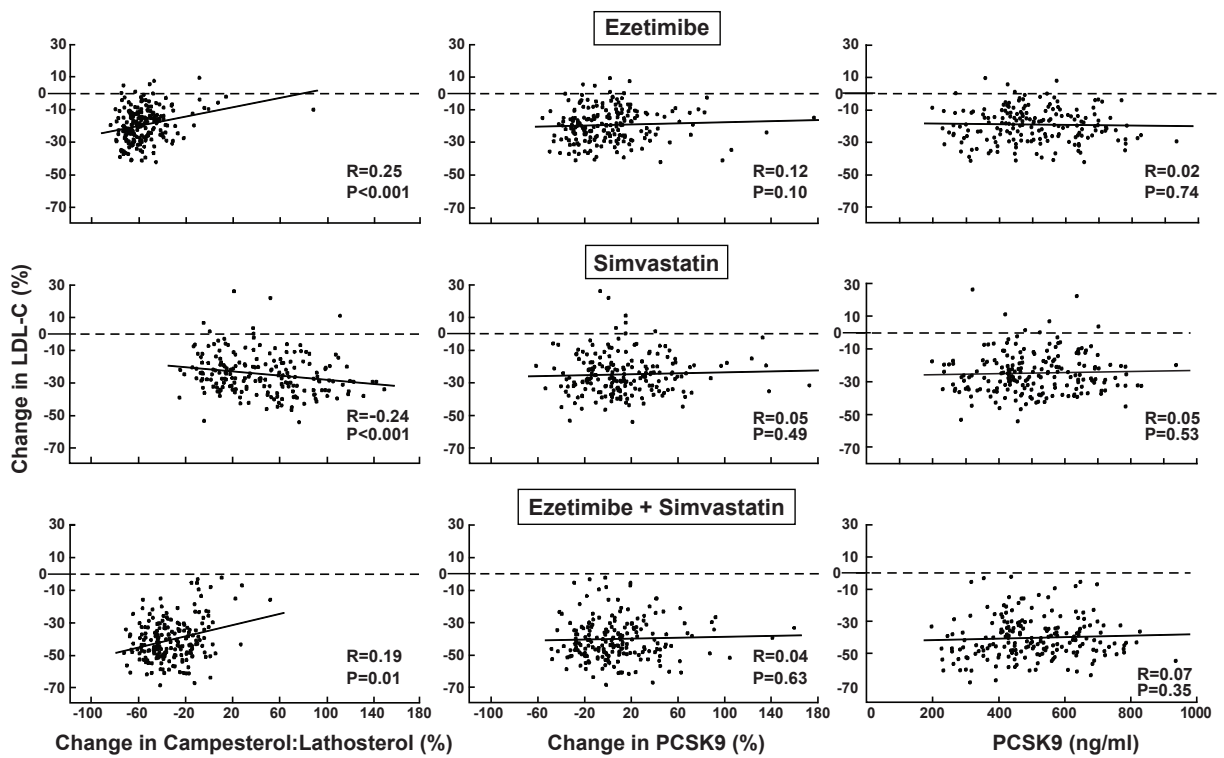

**Figure S2**

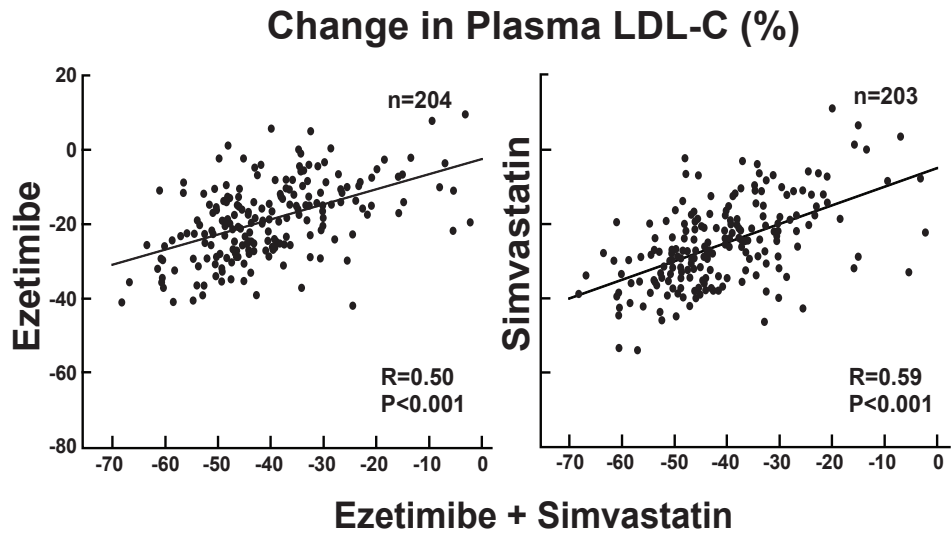

Supplement: jc.2009-1952_1.pdf [file jc.2009-1952_1.pdf]
